# Supplementary material for: Genomic signatures of artificial selection in fecundity of Pacific white shrimp, Penaeus vannamei
Source: Front Genet. 2022 Aug 29;13:929889. doi: 10.3389/fgene.2022.929889 (PMC9465174; doi:10.3389/fgene.2022.929889)
Supplement: Supplementary file 3 [file Table4.XLSX]

## Sheet: Sheet1
No	Pathway	DEGs genes with pathway annotation (28)	All genes with pathway annotation (5269)	Pvalue	Qvalue	Pathway ID	Differentially expressed genes
1	Cardiac muscle contraction	8 (28.57%)	112 (2.13%)	0	3e-06	ko04260	LVAN04168, LVAN04169, LVAN04170, LVAN04171, LVAN04172, LVAN04173, LVAN04175, LVAN04176
2	Adrenergic signaling in cardiomyocytes	9 (32.14%)	160 (3.04%)	0	3e-06	ko04261	LVAN04168, LVAN04169, LVAN04170, LVAN04171, LVAN04172, LVAN04173, LVAN04175, LVAN04176, LVAN18641
3	cGMP - PKG signaling pathway	9 (32.14%)	167 (3.17%)	0	3e-06	ko04022	LVAN04168, LVAN04169, LVAN04170, LVAN04171, LVAN04172, LVAN04173, LVAN04175, LVAN04176, LVAN18641
4	Thyroid hormone signaling pathway	9 (32.14%)	234 (4.44%)	2e-06	3.5e-05	ko04919	LVAN04168, LVAN04169, LVAN04170, LVAN04171, LVAN04172, LVAN04173, LVAN04175, LVAN04176, LVAN18641
5	Long-term depression	4 (14.29%)	54 (1.02%)	0.000168	0.002455	ko04730	LVAN01360, LVAN01361, LVAN01362, LVAN18641
6	Arginine biosynthesis	3 (10.71%)	23 (0.44%)	0.000222	0.002698	ko00220	LVAN01360, LVAN01361, LVAN01362
7	Circadian entrainment	4 (14.29%)	80 (1.52%)	0.000765	0.006978	ko04713	LVAN01360, LVAN01361, LVAN01362, LVAN18641
8	Salivary secretion	4 (14.29%)	80 (1.52%)	0.000765	0.006978	ko04970	LVAN01360, LVAN01361, LVAN01362, LVAN18641
9	Apelin signaling pathway	4 (14.29%)	84 (1.59%)	0.000919	0.007458	ko04371	LVAN01360, LVAN01361, LVAN01362, LVAN18641
10	Relaxin signaling pathway	4 (14.29%)	95 (1.8%)	0.001457	0.010638	ko04926	LVAN01360, LVAN01361, LVAN01362, LVAN18641
11	Calcium signaling pathway	4 (14.29%)	114 (2.16%)	0.00285	0.018912	ko04020	LVAN01360, LVAN01361, LVAN01362, LVAN18641
12	Arginine and proline metabolism	3 (10.71%)	65 (1.23%)	0.004711	0.028656	ko00330	LVAN01360, LVAN01361, LVAN01362
13	Linoleic acid metabolism	2 (7.14%)	26 (0.49%)	0.008181	0.045937	ko00591	LVAN11224, LVAN11225
14	Serotonergic synapse	3 (10.71%)	83 (1.58%)	0.009297	0.046753	ko04726	LVAN11224, LVAN11225, LVAN18641
15	Inflammatory mediator regulation of TRP channels	3 (10.71%)	84 (1.59%)	0.009607	0.046753	ko04750	LVAN11224, LVAN11225, LVAN18641
16	Ovarian Steroidogenesis	2 (7.14%)	45 (0.85%)	0.02342	0.106853	ko04913	LVAN11224, LVAN11225
17	Arachidonic acid metabolism	2 (7.14%)	56 (1.06%)	0.035151	0.150942	ko00590	LVAN11224, LVAN11225
18	NOD-like receptor signaling pathway	2 (7.14%)	66 (1.25%)	0.047399	0.186554	ko04621	LVAN18641, LVAN24327
19	Hippo signaling pathway -fly	3 (10.71%)	156 (2.96%)	0.048555	0.186554	ko04391	LVAN07631, LVAN09598, LVAN09729
20	Renin secretion	2 (7.14%)	72 (1.37%)	0.055395	0.202193	ko04924	LVAN00096, LVAN18641
21	One carbon pool by folate	1 (3.57%)	14 (0.27%)	0.071967	0.250087	ko00670	LVAN09999
22	Chemokine signaling pathway	2 (7.14%)	87 (1.65%)	0.077252	0.250087	ko04062	LVAN09598, LVAN18641
23	Apoptosis - fly	2 (7.14%)	88 (1.67%)	0.078795	0.250087	ko04214	LVAN07631, LVAN23788
24	Vascular smooth muscle contraction	2 (7.14%)	106 (2.01%)	0.108128	0.32889	ko04270	LVAN04174, LVAN18641
25	Other types of O-glycan biosynthesis	1 (3.57%)	26 (0.49%)	0.129655	0.369624	ko00514	LVAN10813
26	Phagosome	3 (10.71%)	239 (4.54%)	0.131647	0.369624	ko04145	LVAN01360, LVAN01361, LVAN01362
27	Notch signaling pathway	1 (3.57%)	32 (0.61%)	0.157187	0.421556	ko04330	LVAN10813
28	p53 signaling pathway	1 (3.57%)	33 (0.63%)	0.161693	0.421556	ko04115	LVAN23788
29	Taste transduction	1 (3.57%)	37 (0.7%)	0.179486	0.422788	ko04742	LVAN18641
30	Endocrine and other factor-regulated calcium reabsorption	1 (3.57%)	37 (0.7%)	0.179486	0.422788	ko04961	LVAN18641
31	Antigen processing and presentation	1 (3.57%)	39 (0.74%)	0.188246	0.422788	ko04612	LVAN09597
32	Cortisol synthesis and secretion	1 (3.57%)	39 (0.74%)	0.188246	0.422788	ko04927	LVAN18641
33	Apoptosis - multiple species	1 (3.57%)	40 (0.76%)	0.192592	0.422788	ko04215	LVAN23788
34	Carbohydrate digestion and absorption	1 (3.57%)	41 (0.78%)	0.196915	0.422788	ko04973	LVAN18641
35	Pancreatic secretion	2 (7.14%)	166 (3.15%)	0.220111	0.45909	ko04972	LVAN00096, LVAN18641
36	Endocytosis	2 (7.14%)	171 (3.25%)	0.22999	0.466369	ko04144	LVAN09598, LVAN11179
37	Long-term potentiation	1 (3.57%)	53 (1.01%)	0.247086	0.487495	ko04720	LVAN18641
38	Lysosome	2 (7.14%)	185 (3.51%)	0.257823	0.495291	ko04142	LVAN11222, LVAN18842
39	Aldosterone synthesis and secretion	1 (3.57%)	61 (1.16%)	0.27884	0.499445	ko04925	LVAN18641
40	Rap1 signaling pathway	2 (7.14%)	207 (3.93%)	0.301734	0.499445	ko04015	LVAN09598, LVAN18641
41	Melanogenesis	1 (3.57%)	68 (1.29%)	0.305562	0.499445	ko04916	LVAN18641
42	Glucagon signaling pathway	1 (3.57%)	68 (1.29%)	0.305562	0.499445	ko04922	LVAN18641
43	Insulin secretion	1 (3.57%)	69 (1.31%)	0.3093	0.499445	ko04911	LVAN18641
44	Tight junction	2 (7.14%)	211 (4%)	0.309702	0.499445	ko04530	LVAN04174, LVAN09598
45	Parathyroid hormone synthesis, secretion and action	1 (3.57%)	74 (1.4%)	0.327704	0.499445	ko04928	LVAN18641
46	Thyroid hormone synthesis	1 (3.57%)	75 (1.42%)	0.331327	0.499445	ko04918	LVAN18641
47	Cholinergic synapse	1 (3.57%)	76 (1.44%)	0.334932	0.499445	ko04725	LVAN18641
48	GnRH signaling pathway	1 (3.57%)	76 (1.44%)	0.334932	0.499445	ko04912	LVAN18641
49	Phosphatidylinositol signaling system	1 (3.57%)	78 (1.48%)	0.342085	0.499445	ko04070	LVAN18641
50	Dopaminergic synapse	1 (3.57%)	78 (1.48%)	0.342085	0.499445	ko04728	LVAN18641
51	Inositol phosphate metabolism	1 (3.57%)	81 (1.54%)	0.352677	0.504811	ko00562	LVAN18641
52	Axon guidance	1 (3.57%)	84 (1.59%)	0.363103	0.509741	ko04360	LVAN09598
53	Wnt signaling pathway	1 (3.57%)	90 (1.71%)	0.383472	0.517798	ko04310	LVAN18641
54	Gap junction	1 (3.57%)	91 (1.73%)	0.386806	0.517798	ko04540	LVAN18641
55	Glutamatergic synapse	1 (3.57%)	92 (1.75%)	0.390121	0.517798	ko04724	LVAN18641
56	Estrogen signaling pathway	1 (3.57%)	96 (1.82%)	0.403213	0.524648	ko04915	LVAN18641
57	Sphingolipid signaling pathway	1 (3.57%)	98 (1.86%)	0.409656	0.524648	ko04071	LVAN18641
58	Phospholipase D signaling pathway	1 (3.57%)	105 (1.99%)	0.431685	0.543327	ko04072	LVAN18641
59	Retrograde endocannabinoid signaling	1 (3.57%)	113 (2.14%)	0.45589	0.564067	ko04723	LVAN18641
60	MAPK signaling pathway - fly	1 (3.57%)	124 (2.35%)	0.487555	0.593192	ko04013	LVAN07631
61	Spliceosome	1 (3.57%)	135 (2.56%)	0.517439	0.61849	ko03040	LVAN16726
62	Gastric acid secretion	1 (3.57%)	138 (2.62%)	0.525293	0.61849	ko04971	LVAN18641
63	Phototransduction - fly	1 (3.57%)	154 (2.92%)	0.565142	0.654848	ko04745	LVAN18641
64	Adherens junction	1 (3.57%)	164 (3.11%)	0.588389	0.662756	ko04520	LVAN09598
65	Platelet activation	1 (3.57%)	171 (3.25%)	0.603944	0.662756	ko04611	LVAN18641
66	Oxytocin signaling pathway	1 (3.57%)	172 (3.26%)	0.606119	0.662756	ko04921	LVAN18641
67	Purine metabolism	1 (3.57%)	173 (3.28%)	0.608283	0.662756	ko00230	LVAN09999
68	Hippo signaling pathway	1 (3.57%)	179 (3.4%)	0.621027	0.66669	ko04390	LVAN09598
69	Apoptosis	1 (3.57%)	191 (3.62%)	0.645326	0.682736	ko04210	LVAN23788
70	Protein processing in endoplasmic reticulum	1 (3.57%)	200 (3.8%)	0.662557	0.685507	ko04141	LVAN09597
71	Regulation of actin cytoskeleton	1 (3.57%)	207 (3.93%)	0.675398	0.685507	ko04810	LVAN04174
72	Metabolic pathways	7 (25%)	1437 (27.27%)	0.676117	0.685507	ko01100	LVAN01360, LVAN01361, LVAN01362, LVAN09999, LVAN11224, LVAN11225, LVAN18641
73	Neuroactive ligand-receptor interaction	1 (3.57%)	236 (4.48%)	0.723753	0.723752	ko04080	LVAN09598
